# Supplementary material
Source: PubMed Central journal article supplement (PMC7648722)

**Supplemental Figure 1. Flow Diagram**

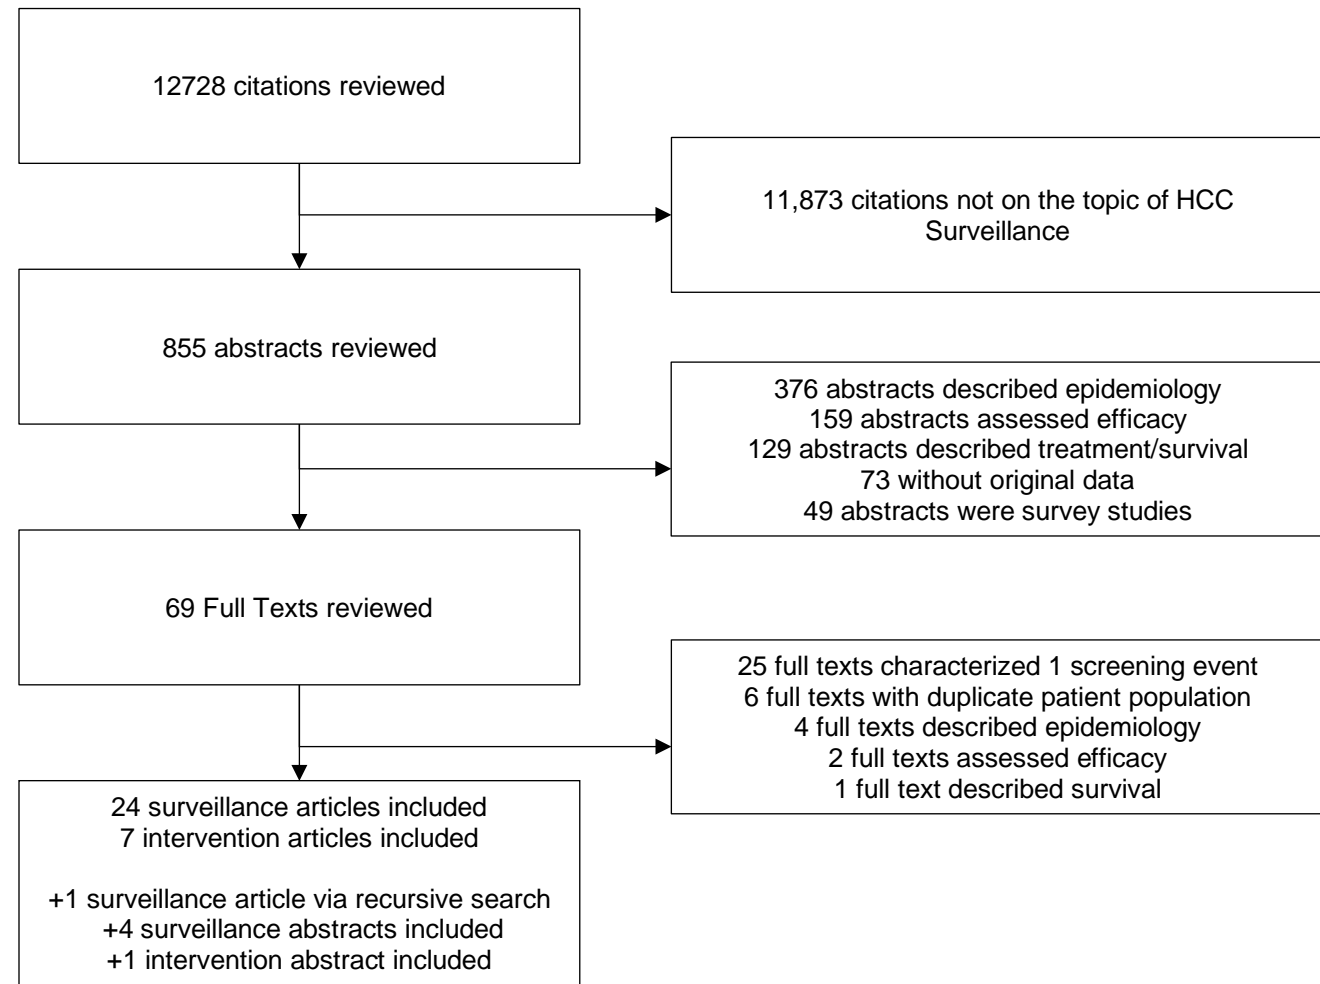

Supplement: NIHMS1601914-supplement-Supp_FigS1.pdf [file NIHMS1601914-supplement-Supp_FigS1.pdf]
